# Supplementary material for: Bimetallic Metal-Organic Framework-Derived Carbon Nanotube-Based Frameworks for Enhanced Capacitive Deionization and Zn-Air Battery
Source: PubMed Central journal article supplement (PMC6593352; doi:10.3389/fchem.2019.00449), 2019-06-19
Supplement: Data_Sheet_1.pdf [file Data_Sheet_1.pdf]

## *Supplementary Material*

# **Bimetallic Metal-Organic Framework-derived Carbon Nanotube-based Frameworks for Enhanced Capacitive Deionization and Zn-air Battery**

**Wenhui Shi<sup>1†</sup>, Xilian Xu<sup>2†</sup>, Chenzeng Ye<sup>1†</sup>, Dongyong Sha<sup>2</sup>, Ruilian Yin<sup>2</sup>, Xuhai Shen<sup>2</sup>, Xiaoyue Liu<sup>1</sup>, Wenxian Liu<sup>2</sup>, Jiangnan Shen<sup>1\*</sup>, Xiehong Cao<sup>2\*</sup>, Congjie Gao<sup>1</sup>**

<sup>1</sup>Center for Membrane Separation and Water Science & Technology, Ocean College, Zhejiang University of Technology, Hangzhou, China

<sup>2</sup>College of Materials Science and Engineering, Zhejiang University of Technology, Hangzhou, China

**\* Correspondence:**

Jiangnan Shen  
shenj@zjut.edu.cn  
Xiehong Cao  
gcscaxh@zjut.edu.cn

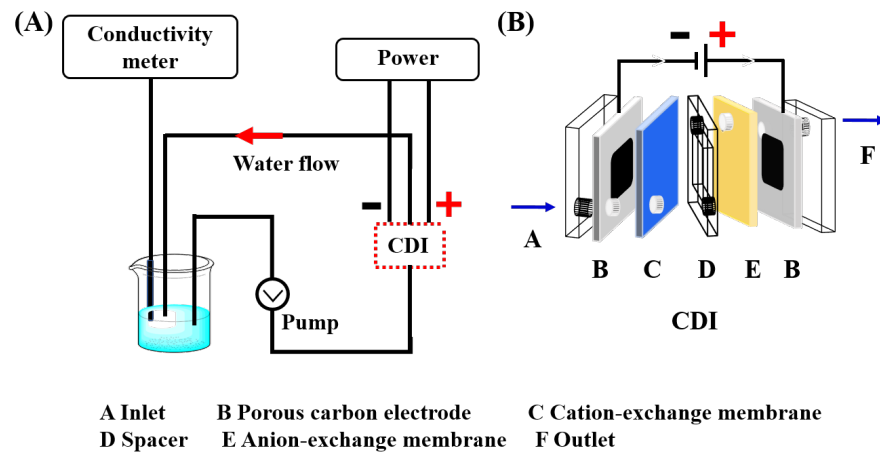

**FIGURE S1** | Scheme for the experimental setups of (A) CDI process and (B) the CDI cell.

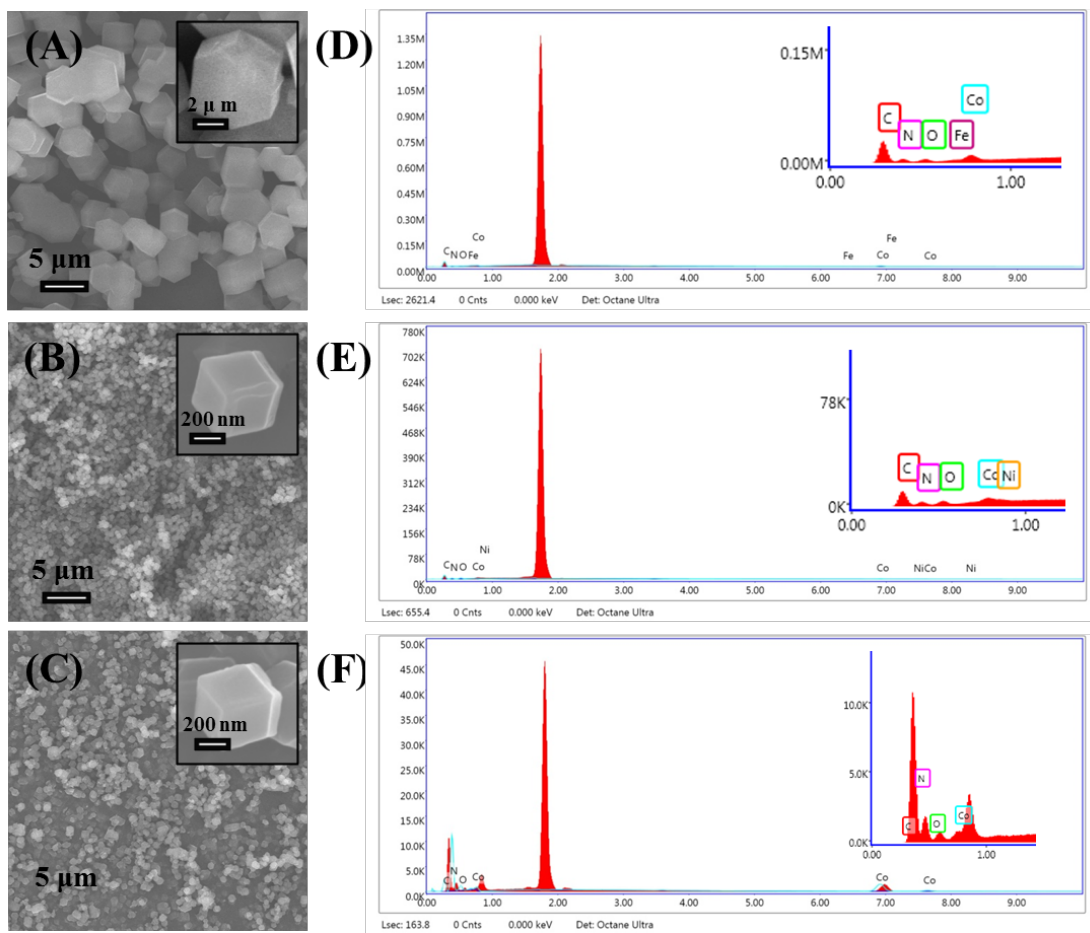

**FIGURE S2** | (A)-(C) SEM images of CoFe-MOF, CoNi-MOF and Co-MOF crystals. (D)-(F) The corresponding EDX spectra of CoFe-MOF, CoNi-MOF and Co-MOF crystals.

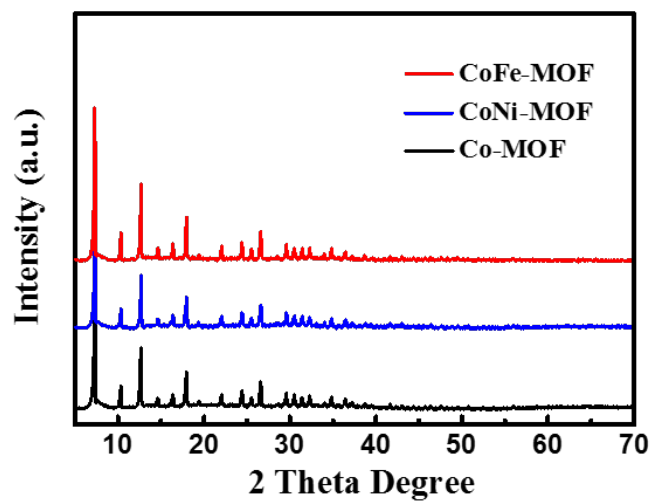

**FIGURE S3** | XRD patterns of CoFe-MOF, CoNi-MOF and Co-MOF crystals.

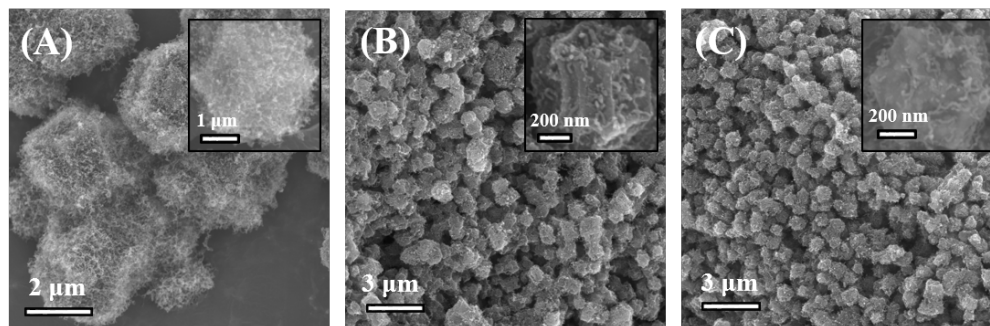

**FIGURE S4** | SEM images of (A) CoFe-CNTF, (B) CoNi-CNTF and (C) Co-CNTF.

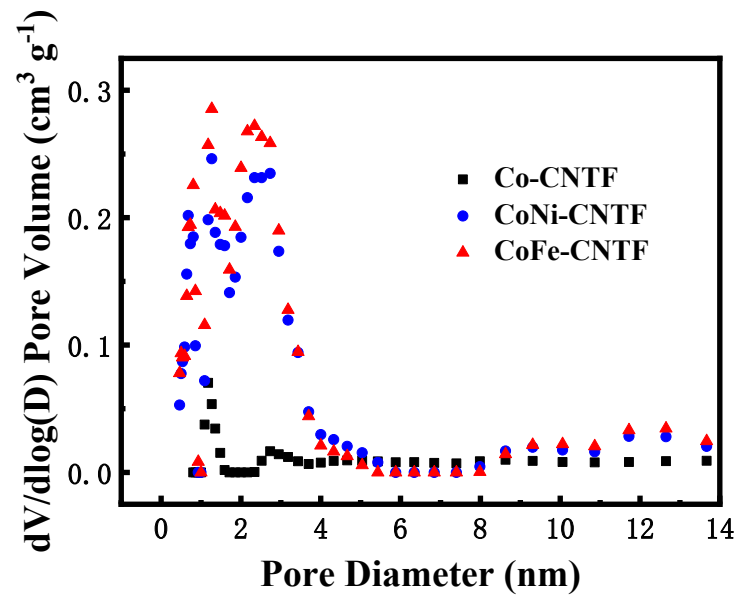

**FIGURE S5** | The pore size distributions of Co-CNTF, CoNi-CNTF and CoFe-CNTF

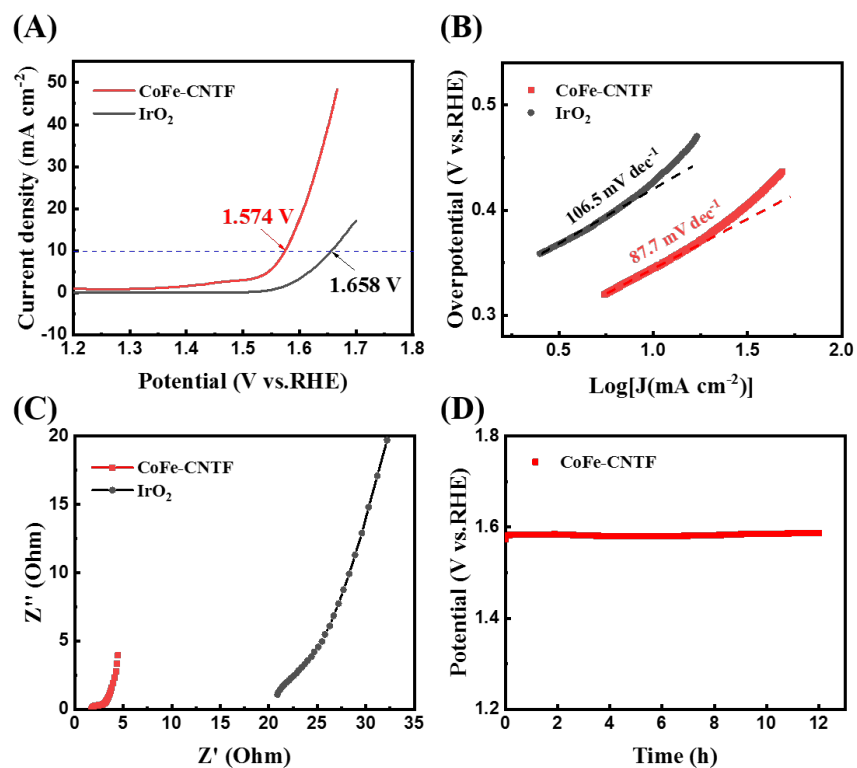

**FIGURE S6** | (A) Linear sweep voltammetry (LSV) curves and (B) corresponding Tafel plots of CoFe-CNTF and IrO<sub>2</sub> in 1.0 M KOH at a scan rate of 5 mV s<sup>-1</sup>. (C) Nyquist plots of CoFe-CNTF and IrO<sub>2</sub>. (D) Galvanostatic measurement of OER of CoFe-CNTF at a constant current density of 10 mA cm<sup>-2</sup>.

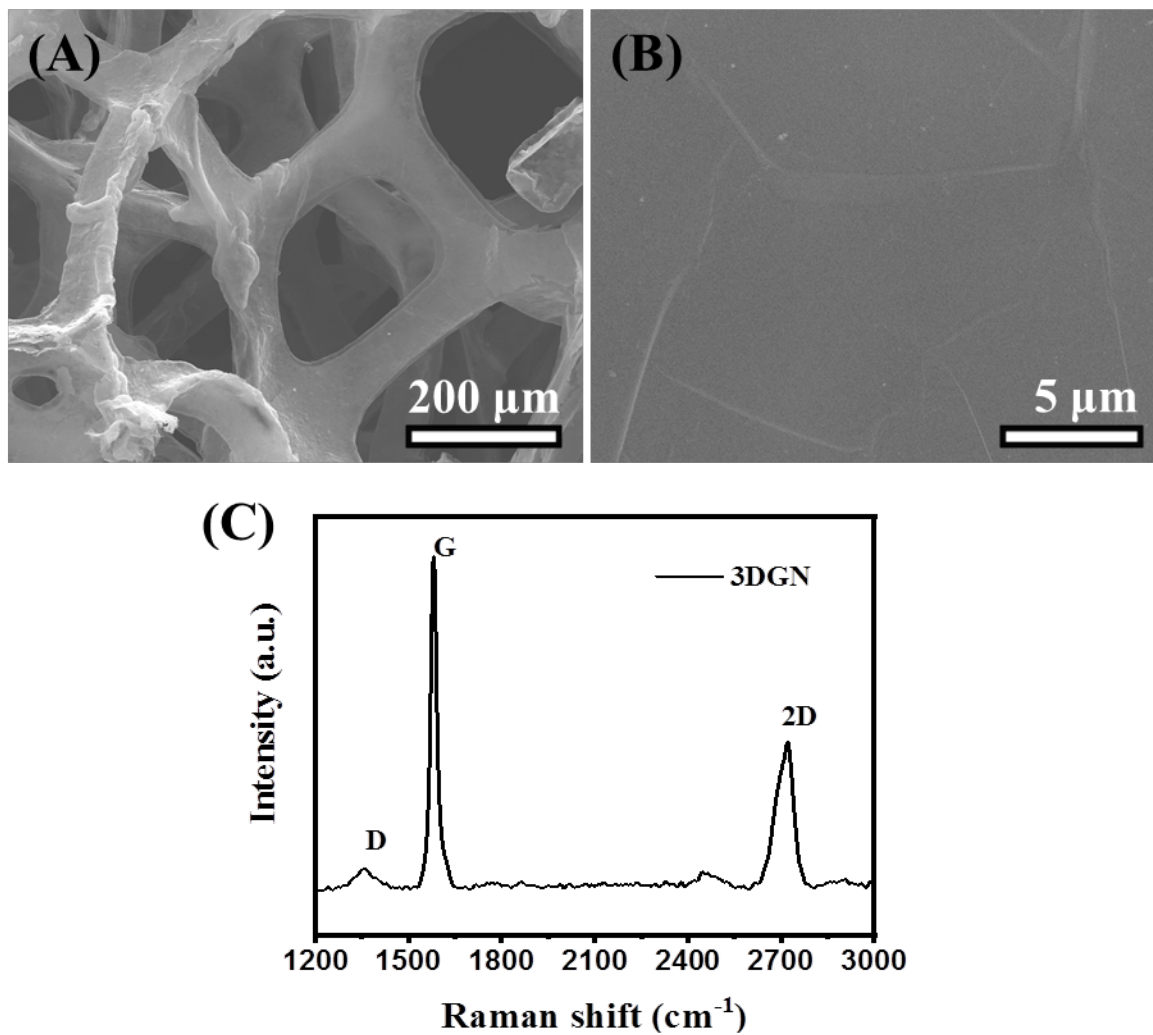

**FIGURE S7** | (A, B) SEM images and (C) Raman spectrum of 3DG.



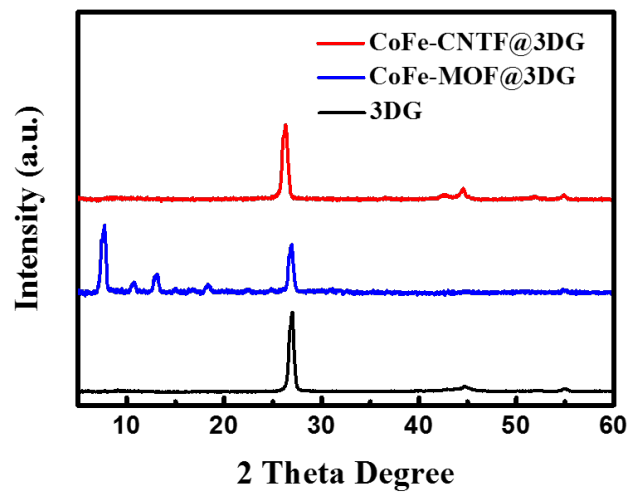

**FIGURE S8** | XRD patterns of CoFe-CNTF@3DG, CoFe-MOF@3DG and 3DG.

**Table S1.** The comparison of CDI performance of our work with various recently reported carbon-based materials.

| <b>Electrode Materials</b>     | <b>Cell Potential (V)</b> | <b>Initial Salt Concentration (mg L<sup>-1</sup>)</b> | <b>Removal Capacity (mg g<sup>-1</sup>)</b> | <b>Reference</b>                                     |
|--------------------------------|---------------------------|-------------------------------------------------------|---------------------------------------------|------------------------------------------------------|
| TiO <sub>2</sub> /GO           | 0.8                       | 300                                                   | 9.1                                         | <i>Desalination</i> , 2015, 361, 53-64.              |
| Graphene Laminate              | 1.2                       | 400                                                   | 15.3                                        | <i>Desalination</i> , 2015, 357, 178-188.            |
| Sulfonated Graphene-CNF        | 1.2                       | 400                                                   | 9.54                                        | <i>Adv. Mater. Inter.</i> , 2015, 2, 1500372.        |
| Nitrogen-doped graphene Sponge | 1.2                       | 500                                                   | 14.8                                        | <i>ACS Sustain. Chem. Eng.</i> , 2017, 5, 325-333.   |
| PVA/Active Carbon              | 1.2                       | 565                                                   | 14.4                                        | <i>Environ. Sci. Technol.</i> , 2018, 52, 5859-5867. |
| MIL-88-derived PC/rGO          | 1.2                       | 500                                                   | 30.3                                        | <i>ACS Omega</i> , 2018, 3, 8506-8513.               |
| CNFH                           | 1.4                       | 500                                                   | 43.3                                        | <i>Adv. Mater. Technol.</i> , 2018, 1800135.         |
| Bimetallic MOF derived PC      | 1.4                       | 750                                                   | 45.62                                       | <i>J. Mater. Chem. A</i> , 2017, 5, 6113-6121.       |
| Co-Fe-CNT/PC                   | 1.2                       | 500                                                   | 37.0                                        | <b>This work</b>                                     |
|                                | 1.4                       | 500                                                   | 47.0                                        |                                                      |
